# Supplementary material for: Carvacrol and Thymol Combat Desiccation Resistance Mechanisms in Salmonella enterica Serovar Tennessee
Source: MDPI journal article supplement (doi:10.3390/microorganisms10010044), 2021-12-26
Supplement: s1 [file s1]

**Supplementary Table S1.** Primers used for the reverse transcription-quantitative polymerase chain reaction analysis.

| Gene        | Forward Primer (5' → 3') | Reverse Primer (5' → 3') | References |
|-------------|--------------------------|--------------------------|------------|
| <i>gapA</i> | GGTGTTGACGTAGTGGCTGAA    | AGCGTTGGAAACGATGTCCTG    | (1)        |
| <i>proV</i> | CCACAATGGTACGCCTTCTCA    | GCATGAGCGCAAATGACTGGA    |            |
| STM1494     | GCACACCCTCACCCTAAAAC     | GCAGGTCGGCTGAGTAAAAT     | (2)        |
| <i>KdpA</i> | TGGGACTGGGCATCCTGTT      | GGTAGCCGCTGCGGATTTA      | (3)        |
| <i>otsB</i> | TTAACCGTATCCCCGAACTC     | CCGCGAGACGGTCTAACAAC     | (4)        |

## References

1. Finn S, Händler K, Condell O, Colgan A, Cooney S, McClure P, Amézquita A, Hinton JCD, Fanning S. 2013. ProP is required for the survival of desiccated *Salmonella enterica* serovar Typhimurium cells on a stainless steel surface. *Appl Environ Microbiol* **79**:4376–4384.
2. Frossard SM, Khan AA, Warrick EC, Gately JM, Hanson AD, Oldham ML, Sanders DA, Csonka LN. 2012. Identification of a third osmoprotectant transport system, the osmU system, in *Salmonella enterica*. *J Bacteriol* **194**:3861–3871.
3. Gruzdev N, McClelland M, Porwollik S, Ofaim S, Pinto R, Saldinger-Sela S. 2012. Global transcriptional analysis of dehydrated *Salmonella enterica* Serovar Typhimurium. *Appl Environ Microbiol* **78**:7866–7875.
4. Balaji B, O'Connor K, Lucas JR, Anderson JM, Csonka LN. 2005. Timing of induction of osmotically controlled genes in *Salmonella enterica* serovar Typhimurium, determined with quantitative real-time reverse transcription-PCR. *Appl Environ Microbiol* **71**:8273–8283.
